# Supplementary material for: Association between long non-coding RNA polymorphisms and cancer risk: a meta-analysis
Source: PubMed Central journal article supplement (PMC6066654; doi:10.1042/bsr20180365), 2018-07-31
Supplement: bsr20180365_Supp1.pdf [file bsr20180365_Supp1.pdf]

**Supplementary Table S1. Quality assessment of eligible studies (Newcastle-Ottawa Scale).**

| Study              | Selection                   |                |                                 | Comparability                     |                                    |     | Outcome               |                    | Total |
|--------------------|-----------------------------|----------------|---------------------------------|-----------------------------------|------------------------------------|-----|-----------------------|--------------------|-------|
|                    | Adequacy of case definition | Number of case | Representativeness of the cases | Ascertainment of relevant cancers | Ascertainment of genotyping method | HWE | Assessment of outcome | Adequate follow up |       |
| Khorshidi 2017     | HR                          | 1              | 0                               | 1                                 | 1                                  | 1   | 1                     | 1                  | 7     |
| Kang M 2015        |                             | 1              | 1                               | 1                                 | 1                                  | 1   | 1                     | 1                  | 8     |
| Taheri M 2017      |                             | 1              | 0                               | 1                                 | 1                                  | 1   | 1                     | 1                  | 7     |
| Peng R 2017        |                             | 1              | 1                               | 1                                 | 1                                  | 1   | 1                     | 1                  | 8     |
| Liu Y 2012         |                             | 1              | 1                               | 1                                 | 1                                  | 1   | 1                     | 1                  | 8     |
| Li Y 2017          |                             | 1              | 1                               | 1                                 | 1                                  | 1   | 1                     | 1                  | 8     |
| Gong WJ 2016       |                             | 1              | 1                               | 1                                 | 1                                  | 1   | 1                     | 1                  | 8     |
| Hu P 2017          |                             | 1              | 1                               | 1                                 | 1                                  | 1   | 1                     | 1                  | 8     |
| Shaker OG 2017     |                             | 1              | 0                               | 1                                 | 1                                  | 0   | 1                     | 1                  | 6     |
| He BS 2017         |                             | 1              | 1                               | 1                                 | 1                                  | 1   | 1                     | 1                  | 8     |
| Duan F 2017        |                             | 1              | 1                               | 1                                 | 1                                  | 1   | 1                     | 1                  | 8     |
| Li L 2016          |                             | 1              | 1                               | 1                                 | 1                                  | 1   | 1                     | 1                  | 8     |
| Sattarifard H 2017 |                             | 1              | 1                               | 1                                 | 1                                  | 0   | 1                     | 1                  | 7     |
| Li L 2013          |                             | 1              | 1                               | 1                                 | 1                                  | 1   | 1                     | 1                  | 8     |
| Chung S 2010       |                             | 1              | 1                               | 1                                 | 0                                  | 1   | 1                     | 1                  | 7     |
| Salinas CA 2008    |                             | 1              | 1                               | 1                                 | 0                                  | 1   | 1                     | 1                  | 7     |
| Zheng SL 2010      |                             | 1              | 0                               | 1                                 | 1                                  | 1   | 1                     | 1                  | 7     |

HWE, Hardy-Weinberg equilibrium.

**Supplementary Table S2. The results of ORs and 95% CI of sensitivity analysis.**

| Excluding literature one by one | Mutation homozygote vs. |                        | Heterozygote vs.       |                        | Recessive model        |
|---------------------------------|-------------------------|------------------------|------------------------|------------------------|------------------------|
|                                 | Allelic model           | wild-type              | wild-type              | Dominant model         |                        |
|                                 | OR(95%CI)               | OR(95%CI)              | OR(95%CI)              | OR(95%CI)              | OR(95%CI)              |
| ANRIL rs1333048 A/C             |                         |                        |                        |                        |                        |
| Overall                         | <b>1.67(1.35-2.08)</b>  | <b>2.40(1.60-3.59)</b> | <b>1.45(1.01-2.09)</b> | <b>1.79(1.28-2.51)</b> | <b>2.01(1.42-2.84)</b> |
| Hamid Reza Khorshidi 2017       | <b>3.04(2.24-4.13)</b>  | 7.55(0.75-14.00)       | 2.98(0.73-5.13)        | 4.18(0.52-6.92)        | 3.93(0.38-6.50)        |
| Mohammad Taheri 2017            | 0.88(0.64-1.21)         | 0.80(0.44-1.48)        | 0.69(0.40-1.18)        | 0.73(0.44-1.20)        | 1.01(0.61-1.69)        |
| ANRIL rs4977574 A/G             |                         |                        |                        |                        |                        |
| Overall                         | <b>0.76(0.64-0.97)</b>  | 0.72(0.43-1.18)        | <b>0.62(0.44-0.87)</b> | <b>0.64(0.46-0.88)</b> | 0.91(0.57-1.46)        |
| Hamid Reza Khorshidi 2017       | 0.71(0.50-1.00)         | 0.58(0.28-1.21)        | <b>0.61(0.37-0.99)</b> | <b>0.60(0.38-0.95)</b> | 0.76(0.38-1.50)        |
| Mohammad Taheri 2017            | 0.82(0.58-1.15)         | 0.87(0.43-1.74)        | 0.63(0.39-1.02)        | 0.68(0.42-1.07)        | 1.08(0.56-2.09)        |
| ANRIL rs10757278 A/G            |                         |                        |                        |                        |                        |
| Overall                         | <b>2.05(1.64-2.57)</b>  | <b>4.26(2.67-6.78)</b> | <b>2.12(1.45-3.11)</b> | <b>2.57(1.80-3.69)</b> | <b>2.63(1.79-3.87)</b> |
| Hamid Reza Khorshidi 2017       | <b>3.31(2.40-4.56)</b>  | 11.20(0.51-22.91)      | 4.74(0.49-9.03)        | 6.40(0.46-11.84)       | 3.94(0.36-6.57)        |
| Mohammad Taheri 2017            | 1.25(0.90-1.71)         | 1.64(0.83-3.28)        | 1.21(0.73-2.00)        | 1.30(0.80-2.10)        | 1.47(0.79-2.73)        |
| ANRIL rs1333045 C/T             |                         |                        |                        |                        |                        |
| Overall                         | 1.14(0.92- 1.43)        | 1.29(0.83-1.99)        | 1.03(0.71-1.49)        | 1.11(0.79-1.56)        | 1.29(0.89-1.88)        |
| Hamid Reza Khorshidi 2017       | 1.00(0.73-1.37)         | 0.98(0.52-1.84)        | 1.09(0.67-1.80)        | 1.06(0.66-1.69)        | 0.93(0.53-1.63)        |
| Mohammad Taheri 2017            | 1.31(0.95-1.81)         | 1.67(0.90-3.08)        | 0.96(0.55-1.66)        | 1.17(0.70-1.95)        | <b>1.72(1.03-2.85)</b> |
| MALAT1 rs619586 A/G             |                         |                        |                        |                        |                        |
| Overall                         | <b>0.77(0.65-0.91)</b>  | 0.58(0.28-1.19)        | <b>0.78(0.65-0.94)</b> | 1.19(0.87-1.62)        | 0.61(0.30-1.26)        |
| Yao Liu 2012                    | <b>0.97(0.50-0.91)</b>  | 0.65(0.25-1.72)        | <b>0.65(0.46-0.92)</b> | 0.65(0.25-1.72)        | 0.70(0.26-1.85)        |
| Rui Peng 2017                   | 0.82(0.67-1.00)         | 0.51(0.17-1.50)        | 0.84(0.67-1.04)        | 0.51(0.17-1.50)        | 0.52(0.18-1.53)        |
| HOTTIP rs1859168 A/C            |                         |                        |                        |                        |                        |
| Overall                         | <b>1.31(1.19-1.45)</b>  | <b>1.54(1.27-1.87)</b> | <b>1.24(1.06-1.45)</b> | <b>1.37(1.18-1.59)</b> | <b>1.49(1.26-1.76)</b> |

|                         |                        |                        |                        |                        |                        |
|-------------------------|------------------------|------------------------|------------------------|------------------------|------------------------|
| Wei-Jing Gong 2016      | <b>1.32(1.18-1.47)</b> | <b>1.54(1.24-1.90)</b> | 1.18(0.99-1.41)        | <b>1.34(1.14-1.57)</b> | <b>1.54(1.28-1.85)</b> |
| Pinghai Hu 2017         | 1.14(0.99-1.32)        | 1.15(0.87-1.51)        | <b>0.76(0.60-0.97)</b> | 0.93(0.75-1.16)        | <b>1.53(1.21-1.93)</b> |
| Fujiao Duan 2017        | <b>1.43(1.27-1.60)</b> | <b>1.83(1.51-2.45)</b> | 1.72(0.44-2.06)        | <b>1.77(1.50-2.10)</b> | <b>1.40(1.13-1.73)</b> |
| HULC rs7763881 A/C      |                        |                        |                        |                        |                        |
| Overall                 | <b>0.90(0.82-0.99)</b> | 0.86(0.71-1.04)        | <b>0.74(0.63-0.86)</b> | <b>0.77(0.66-0.89)</b> | 1.02(0.87-1.20)        |
| Mingqiang Kang 2015     | 0.90(0.82-1.01)        | 0.87(0.70-1.08)        | <b>0.75(0.63-0.89)</b> | <b>0.78(0.66-0.92)</b> | 1.02(0.84-1.22)        |
| Yao Liu 2012            | 0.86(0.72-1.03)        | 0.84(0.56-1.26)        | <b>0.63(0.46-0.85)</b> | <b>0.66(0.50-0.89)</b> | 1.05(0.74-1.49)        |
| PRNCR1 rs16901946 G/A   |                        |                        |                        |                        |                        |
| Overall                 | <b>1.15(1.06-1.24)</b> | <b>1.26(1.06-1.50)</b> | <b>1.15(1.02-1.28)</b> | <b>1.17(1.06-1.30)</b> | <b>1.21(1.03-1.43)</b> |
| Bang-Shun He 2017       | <b>1.12(1.02-1.22)</b> | <b>1.21(1.01-1.45)</b> | 1.11(0.98-1.25)        | <b>1.13(1.01-1.27)</b> | 1.17(0.99-1.39)        |
| Lijuan Li 2016          | <b>1.18(1.08-1.28)</b> | <b>1.36(1.14-1.63)</b> | <b>1.13(1.00-1.28)</b> | <b>1.18(1.06-1.33)</b> | <b>1.31(1.11-1.54)</b> |
| Suyoun Chung 2010       | 1.08(0.96-1.21)        | 1.01(0.80-1.29)        | 1.18(0.99-1.39)        | 1.15(0.98-1.34)        | 1.00(0.80-1.25)        |
| PRNCR1 rs13252298 G/A   |                        |                        |                        |                        |                        |
| Overall                 | <b>0.78(0.72-0.84)</b> | <b>0.67(0.56-0.81)</b> | <b>0.69(0.62-0.77)</b> | <b>0.81(0.73-0.90)</b> | 0.85(0.72-1.01)        |
| Bang-Shun He 2017       | <b>0.76(0.71-0.84)</b> | <b>0.66(0.54-0.80)</b> | <b>0.67(0.59-0.76)</b> | <b>0.81(0.72-0.91)</b> | 0.86(0.71-1.03)        |
| Lijuan Li 2016          | <b>0.74(0.68-0.80)</b> | <b>0.62(0.51-0.75)</b> | <b>0.63(0.56-0.71)</b> | <b>0.75(0.67-0.84)</b> | <b>0.82(0.69-0.98)</b> |
| Lijuan Li 2013          | <b>0.78(0.72-0.85)</b> | <b>0.67(0.56-0.82)</b> | <b>0.69(0.61-0.78)</b> | <b>0.83(0.74-0.93)</b> | 0.86(0.72-1.03)        |
| Suyoun Chung 2010       | 0.95(0.85-1.07)        | 0.96(0.74-1.26)        | 0.87(0.74-1.01)        | 0.88(0.75-1.02)        | 1.14(0.89-1.46)        |
| PRNCR1 rs7007694 C/T    |                        |                        |                        |                        |                        |
| Overall                 | 1.02(0.94-1.11)        | 1.19(0.98-1.44)        | 0.96(0.86-1.07)        | 0.99(0.89-1.10)        | 1.19(0.99-1.44)        |
| Bang-Shun He 2017       | 1.01(0.93-1.11)        | 1.17(0.95-1.44)        | 0.94(0.83-1.06)        | 0.97(0.87-1.09)        | 1.17(0.96-1.44)        |
| Lijuan Li 2016          | 1.07(0.98-1.16)        | <b>1.27(1.03-1.54)</b> | 0.99(0.89-1.12)        | 1.03(0.93-1.16)        | <b>1.25(1.03-1.52)</b> |
| Hedieh Sattarifard 2017 | 1.04(0.96-1.13)        | 1.18(0.98-1.45)        | 0.98(0.87-1.09)        | 1.01(0.91-1.12)        | 1.19(0.99-1.44)        |
| Lijuan Li 2013          | 1.01(0.93-1.10)        | 1.14(0.92-1.40)        | 0.95(0.84-1.07)        | 0.97(0.87-1.09)        | 1.14(0.94-1.39)        |
| Suyoun Chung 2010       | 0.97(0.85-1.10)        | 1.16(0.80-1.67)        | 0.90(0.76-1.05)        | 0.92(0.79-1.08)        | 1.19(0.83-1.71)        |
| PRNCR1 rs1016343 C/T    |                        |                        |                        |                        |                        |

|                         |                        |                        |                        |                        |                        |
|-------------------------|------------------------|------------------------|------------------------|------------------------|------------------------|
| Overall                 | <b>1.31(1.22-1.41)</b> | <b>1.66(1.41-1.97)</b> | <b>1.35(1.22-1.49)</b> | <b>1.41(1.28-1.55)</b> | <b>1.42(1.21-1.66)</b> |
| Lijuan Li 2016          | <b>1.36(1.27-1.47)</b> | <b>1.86(1.55-2.22)</b> | <b>1.37(1.28-1.52)</b> | <b>1.45(1.31-1.59)</b> | <b>1.58(1.33-1.88)</b> |
| Lijuan Li 2013          | <b>1.38(1.28-1.49)</b> | <b>1.88(1.57-2.26)</b> | <b>1.38(1.25-1.54)</b> | <b>1.46(1.32-1.61)</b> | <b>1.59(1.33-1.89)</b> |
| Claudia A. Salinas 2008 | <b>1.30(1.19-1.41)</b> | <b>1.60(1.33-1.94)</b> | <b>1.36(1.21-1.54)</b> | <b>1.42(1.26-1.59)</b> | <b>1.35(1.13-1.61)</b> |
| Siqun Lilly Zheng 2010  | <b>1.29(1.20-1.39)</b> | <b>1.61(1.35-1.91)</b> | <b>1.32(1.19-1.46)</b> | <b>1.37(1.25-1.51)</b> | <b>1.40(1.19-1.65)</b> |
| Suyoun Chung 2010       | <b>1.20(1.09-1.32)</b> | <b>1.31(1.05-1.63)</b> | <b>1.30(1.14-1.48)</b> | <b>1.31(1.16-1.48)</b> | 1.13(0.92-1.39)        |
| PRNCR1 rs1456315 A/G    |                        |                        |                        |                        |                        |
| Overall                 | <b>0.77(0.72-0.83)</b> | <b>0.59(0.50-0.69)</b> | <b>0.76(0.68-0.83)</b> | <b>0.72(0.66-0.79)</b> | <b>0.70(0.60-0.81)</b> |
| Lijuan Li 2016          | <b>0.77(0.72-0.83)</b> | <b>0.60(0.51-0.71)</b> | <b>0.74(0.67-0.82)</b> | <b>0.71(0.65-0.78)</b> | <b>0.72(0.62-0.84)</b> |
| Lijuan Li 2013          | <b>0.75(0.70-0.81)</b> | <b>0.54(0.46-0.64)</b> | <b>0.75(0.68-0.83)</b> | <b>0.71(0.64-0.78)</b> | <b>0.66(0.56-0.76)</b> |
| Suyoun Chung 2010       | 0.93(0.85-1.02)        | <b>0.74(0.60-0.91)</b> | 0.99(0.87-1.13)        | 0.96(0.84-1.08)        | <b>0.80(0.67-0.97)</b> |
| Claudia A. Salinas 2008 | <b>0.72(0.66-0.79)</b> | <b>0.48(0.39-0.60)</b> | <b>0.71(0.63-0.80)</b> | <b>0.68(0.61-0.76)</b> | <b>0.60(0.49-0.75)</b> |

The results are in bold if the ORs and 95% CIs ranged from insignificantly to statistically significantly after removal of an individual study.
